# Supplementary material
Source: Research Square preprint supplement (doi:10.21203/rs.3.rs-9497175/v1)
Supplement: Supplementary file 1 [file 501129ca02806a2e44a60285.xlsx]

## Sheet: Foglio1
Id	pH	ORP	TDS	HCO3-	F-	Cl-	Br-	NO3-	SO42-	Ca2+	Mg2+	Na+	K+	NH4+	NO2-	COD	Ptot	V	Cr	Mn	Fe	Ni	Cu	As	Sb	Pb	∂18O	∂2H	Suspended load
	-	(mV)	(mg/L)	(mg/L)	(mg/L)	(mg/L)	(mg/L)	(mg/L)	(mg/L)	(mg/L)	(mg/L)	(mg/L)	(mg/L)	(mg/L)	(mg/L)	(mg/L)	(mg/L)	(µg/L)	(µg/L)	(µg/L)	(µg/L)	(µg/L)	(µg/L)	(µg/L)	(µg/L)	(µg/L)	(‰ vs. V-SMOW)	(‰ vs. V-SMOW)	(g/L)
G1-A	8.12	93	273.43	170	0.21	16.82	0.04	0.76	18.55	42.9	8.86	12.12	3.03	0.04	< 0.01	14	-	0.433	0.197	3.9	9.4	0.42	0.469	0.232	0.085	0.047	-6.90806	-40.606	-
G2-A	8.23	101	314.541	200	0.245	15.399	0.012	0.918	19.32	57.058	9.444	10.954	1.113	0.04	< 0.01	-	-	0.43281	0.30807	0.80703	3.57588	0.36477	0.72765	0.21735	0.057	0.016	-7.16218	-41.9394	-
G3-A	8.03	105	424.641	270	0.369	19.525	0.014	1.98	24.921	79.34	12.033	14.838	1.51	0.03	0.02	5	-	0.39528	0.21228	1.06689	3.82836	0.39162	2.02581	0.15006	0.042	0.025	-6.65592	-40.2664	-
G4-A	8.11	108	479.619	310	0.395	21.287	0.02	1.915	26.058	85.191	16.067	16.445	2.222	0.03	0.01	-	0.17	0.3168	0.17424	2.72448	3.06702	0.4356	0.79794	0.16434	0.067	0.022	-6.53907	-39.8829	0.008
G5 -A	8.17	107	552.692	319.64	0.327	43.579	0.028	5.914	32.63	93.276	16.233	38.021	2.772	0.03	0.15	10	-	0.38295	0.13455	6.90552	5.39649	0.82179	2.08449	0.207	0.071	0.128	-6.23701	-38.5449	-
G6-A	8.35	100	533.826	320	0.214	38.344	0.031	4.182	32.936	95.465	13.841	26.162	2.448	0.01	0.08	11	-	0.5382	0.2223	10.6392	5.52045	0.71955	1.8564	0.2184	0.053	0.054	-5.93511	-37.8721	0.003
G7-A	8.37	99	528.92	320	0.289	37.529	0.017	3.59	31.929	93.344	13.668	26.18	2.273	0.077	0.02	-	-	0.51657	0.19698	12.669	6.72747	0.81204	2.00799	0.25728	0.05	0.049	-6.32031	-38.7961	-
G8-A	8.24	96	524.689	309.88	0.203	38.409	0.036	2.68	35.413	91.405	14.21	28.757	3.686	0.01	0.05	-	-	0.5656	0.19998	13.0472	8.6961	1.1918	2.63206	0.33532	0.068	0.059	-5.66722	-36.9311	-
G9-A	8.34	94	517.247	290	0.246	43.888	0.039	6.895	37.584	86.709	15.208	32.206	3.336	0.04	0.16	-	-	0.684	0.1938	7.6152	8.7077	1.3414	2.6828	0.3971	0.081	0.086	-5.81016	-36.7679	-
G10-A	8.45	97	515.063	290	0.254	44.262	0.032	5.166	38.132	83.172	15.654	33.262	4.057	0.01	0.08	-	-	0.93314	0.18818	8.64852	7.5757	1.37158	2.69854	0.44232	0.089	0.067	-5.98487	-37.3257	-
G11-A	8.22	100	526.692	300	0.192	44.282	0.036	3.826	40.202	82.765	16.099	36.056	2.684	0.06	0.08	10	0.25	1.104	0.16704	17.1744	8.4	1.4688	2.7168	0.5568	0.092	0.079	-5.94063	-36.8204	-
G12-A	8.63	88	495.291	270	0.217	46.373	0.044	2.25	40.585	78.753	16.81	36.542	3.412	0.04	0.07	9	-	1.23213	0.13668	3.1155	7.45509	1.52358	2.65722	0.63114	0.086	0.067	-5.65871	-36.1525	-
G13-A	7.92	111	532.866	290	0.297	51.497	0.051	3.155	42.767	81.291	17.375	41.777	4.375	0.03	0.08	11	-	1.0582	0.12395	54.8007	12.1619	1.61135	2.72135	0.6734	0.11	0.09	-5.64056	-35.9888	-
E14-A	8.16	95	565.856	300	0.23	55.696	0.06	8.779	48.363	83.181	18.521	44.725	5.288	0.15	0.48	-	-	1.17747	0.15876	23.281	11.6896	2.29257	3.86316	0.77112	0.117	0.115	-5.62212	-36.0206	-
E15-A	8.27	94	597.803	320	0.238	57.483	0.067	8	48.609	89.81	19.202	48.618	4.746	0.05	0.3	15	0.85	1.26442	0.16617	19.0255	11.0627	2.41424	3.78371	0.77355	0.116	0.153	-5.85497	-36.5509	0.008
G16-A	8.21	91	569.995	310	0.268	55.209	0.057	5.611	46.374	84.954	17.716	44.931	4.329	0.04	0.17	21	-	1.26672	0.14616	15.0768	14.3034	2.07263	3.37589	0.83433	0.114	0.114	-5.81271	-36.5226	0.004
G17-A	8.02	114	573.28	310	0.268	54.904	0.066	5.404	46.14	87.49	18.189	45.703	4.326	0.05	0.11	16	-	1.2408	0.132	19.837	11.3854	2.09792	3.39152	0.76032	0.114	0.127	-5.29189	-35.2354	-
G18-A	8.1	92	565.865	310	0.323	53.522	0.048	5.015	45.177	84.201	17.868	44.028	4.435	0.077	0.1	26	0.68	1.6	0.132	12.788	10.68	2.016	2.716	0.944	0.129	0.103	-5.63517	-35.5258	0.011
G19-A	7.92	104	572.219	300	0.503	61.572	0.078	9.094	46.043	80.516	17.439	48.768	6.181	0.1677	0.38	21	-	1.60512	0.1344	11.2819	16.7347	2.08128	2.304	0.99456	0.155	0.136	-5.71174	-36.7087	-
G20-A	8.09	96	590.57	300	0.552	73.62	0.076	8.988	46.402	81.99	18.234	52.076	6.415	0.0774	0.29	20	-	1.69736	0.1568	8.7318	15.6682	2.41472	3.18108	0.98196	0.154	0.141	-5.63176	-35.7647	0.012
G21-A	8.17	103	587.72	300	0.944	76.64	0.086	7.59	46.25	80.996	17.707	50.594	5.733	0.0903	0.26	18	-	1.72556	0.1253	15.888	14.0515	2.16053	2.40416	0.98629	0.174	0.142	-5.13514	-34.3516	0.016
G22-A	8.07	113	597.239	300	2.64	84.21	0.11	7.28	47.26	79.697	17.277	50.55	6.648	0.0774	0.24	21	1.14	1.68305	0.1394	5.0102	12.7858	2.173	2.952	1.0578	0.136	0.122	-5.53562	-35.5431	0.011
G4-B	7.8	109	510.539	330	0.364	23.76	0.037	0.522	26.97	91.37	17.7	17.64	1.97	0.01	< 0.01	19	0.13	0.506	0.262	8.1	11	0.508	1.6	0.24	0.134	0.098	-6.04513	-38.1707	0.003
G5-B	7.95	99	699.177	340	0.401	110	0.049	11.9	37.74	100	16.63	71.96	7.17	0.01	0.03	11	-	0.536	0.31	6.9	11.35	2.4	4	0.274	0.18	1.1	-5.49729	-36.6891	-
G9-B	8.74	91	474.85	240.34	0.59	55.64	0.08	3.05	42.86	66.55	14.36	45.44	5.68	0.19	0.13	-	-	2.1	0.316	8	19	2.1	3	1.49	0.258	1.5	-4.87461	-33.247	-
G11-B	7.82	91	538.74	280	0.46	63.13	0.09	0.72	43.44	65.1	16.98	63.91	4.72	0.13	0.07	23	0.37	1.2	0.272	34	18	1.92	2.2	1.1	0.222	0.376	-4.76459	-31.9077	-
E14-B	8.05	89	643.92	320	0.34	85.77	0.11	5.46	48.24	85.28	18.43	69.53	8.78	0.18	0.24	-	-	1.8	0.338	86	28	3.7	3.9	1.48	0.316	0.388	-4.33184	-31.9916	-
E15-B	8.14	85	644.84	320	0.24	85.87	0.11	3.94	46.78	85.59	18.5	72.32	9.86	0.18	0.08	39	2.01	1.9	0.322	62.5	23	3.71	3.6	1.6	0.33	0.282	-5.07354	-33.5689	0.013
G17-B	8.27	92	607.43	300	0.34	86.98	0.11	1.35	45.87	77.79	18.1	68.26	8.18	0.14	0.04	29	-	1.9	0.274	30.85	20	3.6	3.8	1.732	0.312	0.258	-4.81271	-32.0573	-
G18-B	8.02	110	579.15	250	0.33	92.53	0.09	16.34	45.97	61.93	17.58	79.42	10.38	0.17	0.52	38	3.98	1.7	0.322	4.294	26.034	3.326	2.124	1.594	0.436	0.604	-4.21901	-30.9707	0.017
G19-B	8.55	75	589.96	250	0.87	100	0.11	11.86	51.66	60.74	16.61	77.18	10.96	0.15	0.6	42	-	2.33	0.396	5.79	59	3.5	2.5	1.8	0.476	0.362	-4.69453	-31.8981	-
G20-B	8.59	68	574.12	250	0.6	98.21	0.09	8.01	48.3	59.3	17.33	76.57	11.33	0.26	0.47	21	-	2.8	0.274	4.37	23	3.3	2.06	1.8	0.534	0.298	-4.84506	-32.431	0.02
G22-B	8.39	85	567.83	250	0.58	94.73	0.12	5.79	48.35	57.99	16.32	80.01	10.94	0.17	0.58	30	2.65	3.1	0.318	12.25	22	3.5	3.4	2.1	0.478	0.422	-4.47478	-31.2495	0.011
G4-C	7.56	92	486.44	320	0.34	22.76	0.03	0.3	24.63	81.64	16.89	16.81	2.55	0.01	< 0.01	12	0.17	0.618	0.112	20	0.416	0.848	2.082	0.118	0.048	0.048	-6.4399	-38.8794	0.003
G11-C	7.84	82	583.3	300	0.47	78.57	0.1	1.53	43.32	65.47	17.96	71.62	4.03	0.13	0.24	39	0.57	1.4	0.092	15.18	1.89	2.944	3.43	0.224	2.578	2.6	-4.47562	-30.7602	0.004
E15-C	7.88	84	599.44	290.3	0.36	84.79	0.11	7.11	47.78	74.62	15.93	64.47	10.53	1.35	0.72	62	2.18	2.4	0.234	56.834	19.322	4.086	8.586	1.66	0.504	0.384	-4.85097	-31.2949	1e-05
G18-C	8.74	65	553.78	240.3	0.19	93.94	0.1	10.42	46.55	57.57	16.73	75.35	9.62	0.36	0.38	100	2.79	2.1	0.236	4.476	20.682	4.228	5.734	1.624	0.53	0.598	-4.27416	-30.1789	0.013
G22-C	8.62	114	615.97	260	1.66	120	0.65	8.08	53.71	60.17	16.96	80.89	11.28	0.18	0.62	88	2.5	3.62	0.152	14.502	16.44	3.876	3.632	2.048	0.594	0.428	-4.18468	-30.3536	0.01
G4-D	7.86	227	373.879	230	0.449	19.54	0.07	5.01	23.69	61.49	11.07	15.37	3.97	0.12	0.016	26	2.2	2.5	0.362	38.78	84.148	1.212	6.262	0.46	0.368	0.142	-6.38	-34.19	0.265
G11-D	7.94	296	471.94	250	0.68	40.6	0.11	4.41	49.81	71.82	11.9	33.92	5.7	0.21	0.13	45	0.63	2.5	0.378	51.826	79.958	3.148	7.492	0.936	0.5	0.36	-4.7	-22.11	0.094
E15-D	8.1	268	611.9	350	0.32	44.21	0.09	8.29	52.95	97.1	15	37.33	5.9	0.18	0.24	23	0.75	2.77	0.36	81.318	29.038	3.546	5.84	1.236	0.512	0.184	-5.82	-29.59	0.049
G18-D	8.04	259	492.69	280	0.32	35.99	0.07	6.86	41.1	80.52	12.42	29.13	5.78	0.25	0.14	27	0.68	1.6	0.354	17.73	39.51	3.404	8.184	1.1	0.594	0.13	-5.29	-25.05	0.077
G22-D	8.5	260	437.05	240	0.3	34.43	0.06	7.7	39.93	69.13	11.65	27.86	5.63	0.26	0.13	48	0.77	1.6	0.43	8.316	41.684	3.27	9.402	1.022	0.652	0.174	-5.16	-24.03	0.09
G4-E	8.17	310	448.124	280	0.169	19.42	0.045	4.68	30.69	78.39	14.89	17.34	2.34	0.09	0.005	27	0.19	1.2	0.302	5.552	21.288	0.92	2.34	0.232	0.148	0.076	-6.64734	-33.2427	0.011
G11-E	8.2	323	478.57	270	0.24	35.03	0.07	6.79	39.59	79.83	13.61	29.61	3.66	0.13	0.04	36	0.52	1.848	0.326	33.26	30.344	2.292	4.466	0.572	0.258	0.126	-6.51155	-32.9728	0.029
E15-E	8.18	230	582.78	319.64	0.26	46.72	0.1	11.47	47.82	96.24	17.86	36.3	6.22	0.05	0.13	28	0.63	2	0.262	36.468	14.808	2.76	3.256	0.834	0.33	0.252	-6.15328	-34.3077	0.026
G18-E	8.06	310	487.77	260	0.24	41.61	0.07	15.24	40.52	75.92	13.83	34.4	5.32	0.61	0.18	45	1.11	2.082	0.376	35.424	45.492	2.652	4.1	0.852	0.376	0.166	-6.15794	-31.329	0.044
G22-E	8.16	345	458.081	250	0.3	35.36	0.05	11.7	38.45	72.33	13.38	30.06	5.82	0.63	0.19	43	0.86	2.474	0.44	22.36	62.056	2.954	4.752	0.844	0.386	0.168	-6.20523	-28.9641	0.042
G1-F	8.34	-	293.82	190	0.11	15.89	0.03	0.34	13.81	50.82	10.02	10.84	1.91	0.05	< 0.01	9	-	0.427	0.945	10.941	20.962	0.68	0.82	0.26	0.07	0.41	-7.33077	-38.2303	-
G2-F	8.36	-	325.48	210	0.16	14.83	0.03	0.14	19.06	60.48	9.36	9.92	1.45	0.05	< 0.01	-	-	0.456	0.27	2.162	7.264	0.33	0.62	0.21	0.06	0.12	-7.48595	-39.531	-
G3-F	8.1	-	480.94	310	0.24	21.33	0.04	2.38	25.82	89.02	13.52	16.36	2.22	0.01	< 0.01	6	-	0.418	0.726	3.69	7.036	0.53	1.1	0.15	0.06	0.1	-6.77684	-37.6308	0.0005
G4-F	8.19	-	534.96	350	0.17	22.86	0.1	1.84	27.31	95.04	17.97	17.66	1.98	0.03	< 0.01	1	0.15	0.322	0.17	4.718	5.626	0.4	0.89	0.17	0.11	0.07	-6.94323	-37.4871	0.0008
G5-F	8.44	-	665.04	350	0.32	79.33	0.08	16.98	37.7	110	17.46	52.85	5.06	0.04	0.26	4	-	0.514	0.182	7.932	6.614	1.3	2.5	0.26	0.15	0.42	-6.54608	-36.0432	-
G6-F	8.43	-	536.58	310	0.23	44.09	0.06	4.59	34.21	97.15	14.13	29.64	2.45	0.03	0.1	5	-	0.472	0.394	8.778	8.752	1.2	1.8	0.26	0.11	0.17	-6.20944	-34.8152	0.002
G7-F	8.28	-	539.92	310	0.49	48.5	0.07	4.7	34.89	94.89	14.5	29.12	2.72	0.04	0.07	-	-	0.41	0.304	36.654	12.294	1.4	2	0.25	0.1	0.2	-6.57898	-35.9858	-
G8-F	8.16	-	546.66	309.88	0.3	47.27	0.03	3.68	40.13	94.06	15.95	31.98	3.3	0.08	0.03	9	-	0.388	0.268	21.186	16.828	1.6	2.2	0.28	0.1	0.31	-5.99915	-33.9888	-
G9-F	8.39	-	572.25	310	0.29	53.98	0.04	9.54	42.99	92.89	17.31	40.32	4.71	0.39	0.07	-	-	0.696	0.282	19.814	11.768	2.1	2.7	0.47	0.13	0.23	-6.63394	-35.7605	-
G10-F	8.42	-	570.67	309.88	0.25	54.64	0.04	7.14	44.78	93.85	17.14	39.2	3.75	0.04	0.07	-	-	0.8	0.314	14.304	17.408	2.1	3	0.5	0.14	0.4	-6.01903	-33.2943	-
G11-F	8.13	-	587.07	320	0.18	55.57	0.03	5.2	46.53	92.17	18.26	43.57	5.56	0.09	0.15	11	0.54	0.936	0.276	29.782	22.018	2.2	2.8	0.53	0.15	0.41	-6.01487	-33.2546	0.007
G12-F	8.34	-	585.8	320	0.23	55.9	0.06	4.95	46.73	91.31	18.48	43.86	4.28	0.06	0.1	12	-	0.908	0.484	38.778	28.86	2.6	3.3	0.52	0.15	1.2	-6.12668	-33.323	-
G13-F	8.18	-	625.78	330	0.46	67.98	0.1	7.76	49.47	93.95	19.65	51.79	4.62	0.06	0.11	4	-	1.052	0.192	81.996	13.192	2.1	2.5	0.63	0.19	0.28	-7.15414	-37.1029	-
E14-F	8.25	-	652.68	350	0.31	60.81	0.06	15.77	49.4	100	19.25	48.38	5.52	0.1	0.42	-	-	1.066	0.344	32.532	17.356	3	5.1	0.63	0.19	0.99	-6.36091	-34.9756	-
E15-F	8.27	-	652.66	350.14	0.21	61.51	0.05	14.75	48.46	100	19.33	50.16	5.09	0.04	0.51	7	1.1	1.094	0.242	21.88	15.898	2.6	3.4	0.79	0.19	0.39	-6.25511	-34.6474	0.015
G16-F	8.25	-	655.37	350	0.27	68.37	0.08	11.93	49.71	100.03	19.32	51.22	4.44	0.05	0.23	18	-	0.926	0.2	1.474	2.292	2.3	1.8	0.69	0.18	0.18	-5.53082	-32.2886	0.004
G17-F	8.18	-	667.03	360	0.22	65.66	0.08	11.95	49.76	100	19.35	51.08	5.67	0.04	0.18	4	-	2.032	0.222	20.658	10.56	3	3.1	0.7	0.19	0.37	-6.43997	-35.0368	-
G18-F	8.19	-	653.33	330	0.23	72.76	0.1	21.51	50.11	95.61	18.38	56.82	6.85	0.3	0.33	8	1.61	2.056	0.25	22.096	15.24	2.6	3.1	0.75	0.21	0.51	-6.16811	-33.96	0.007
G19-F	8.38	-	664.73	340	0.23	69.25	0.09	19.76	49.95	100.36	19.59	58.09	6.53	0.15	0.34	6	-	1.276	0.514	26.954	15.878	3.7	3.1	0.84	0.24	1.1	-6.04585	-33.4319	-
G20-F	8.58	-	652.38	330	0.19	70.41	0.08	19.33	49.59	99.68	19.17	56.95	6.2	0.14	0.33	1	-	2.476	0.202	6.258	11.028	2.6	3.4	0.83	0.23	0.28	-6.00924	-33.1204	0.013
G21-F	8.47	-	659.72	340	0.27	68.83	0.09	19.29	49.89	99.21	19.5	56.46	5.37	0.09	0.3	7	-	1.346	0.258	21.244	11.61	2.5	2.9	0.73	0.23	0.41	-6.84761	-35.5763	0.012
G22-F	8.3	-	650.84	330	0.25	68.8	0.1	19.6	51.02	99.27	19.19	56.01	6.05	0.08	0.37	6	1.14	1.34	0.218	14.466	11.19	2.5	2.6	0.85	0.23	0.31	-6.15313	-33.4676	0.013
Table S1: Complete geochemical and isotopic dataset of the Greve River water samples and suspended load collected from May to October 2022.
